# Supplementary material
Source: PubMed Central journal article supplement (PMC9616177)
Supplement: NIHMS1841397-supplement-Appendices_A__B__C.pdf [file NIHMS1841397-supplement-Appendices_A__B__C.pdf]

## Appendix A: Summary of all classes and relations used to express permissions identified in the source data.

*Table A1. Terms Present in the Informed Consent Ontology – including PURLs, Labels, Definitions, and Proposed Revisions and Comments – Used to Express Permissions Identified in the Source Data. Note: \*\*\* in the Ontology Label column denotes that the given term was identified through the review of US Federal Regulations via the literature. All other terms were first identified from permission-sentences from clinical consent forms.*

| Ontology PURL                     | Ontology Label               | Ontology Definition                                                                                                                                                                                                                                                                    | Recommendations and Comments |
|-----------------------------------|------------------------------|----------------------------------------------------------------------------------------------------------------------------------------------------------------------------------------------------------------------------------------------------------------------------------------|------------------------------|
| <b>Source Ontologies: Classes</b> |                              |                                                                                                                                                                                                                                                                                        |                              |
| BFO:0000040                       | material entity              | An independent continuant that is spatially extended whose identity is independent of that of other entities and can be maintained through time.                                                                                                                                       | --                           |
| DUO:0000001                       | data use limitation          | A data item that is used to indicate consent permissions for datasets and/or materials, and relates to the purposes for which datasets and/or material might be removed, stored or used.                                                                                               | --                           |
| DUO:0000038                       | genetic research             | Biomedical research concerning genetics (i.e., the study of genes, genetic variations and heredity).                                                                                                                                                                                   | --                           |
| DUO:0000039                       | drug development research*** | Biomedical research concerning drug development.                                                                                                                                                                                                                                       | --                           |
| IAO:0000027                       | data item***                 | a data item is an information content entity that is intended to be a truthful statement about something (modulo, e.g., measurement precision or other systematic errors) and is constructed/acquired by a method which reliably tends to produce (approximately) truthful statements. | --                           |
| IAO:0000030                       | information content entity   | A generically dependent continuant that is about some thing.                                                                                                                                                                                                                           | --                           |
| IAO:0000185                       | photograph                   | A photograph is created by projecting an image onto a photosensitive surface such as a chemically treated plate or film, CCD receptor, etc.                                                                                                                                            | --                           |
| IAO:0000572                       | documenting                  | A planned process in which a document is created or added to by including the specified input in it.                                                                                                                                                                                   | --                           |
| IAO:0021006                       | obligee role***              | A role that is either the specified output of an obligation generating social act or the concretization of a transferable obligation and that is realized by its bearer being the providing part of a process that fulfills the previously agreed upon requirements.                   | --                           |
| IAO:0021300                       | obligor role***              | A role that is either the specified output of an obligation generating social act or the concretization of a transferable obligation and that is realized by its bearer being the                                                                                                      | --                           |

|             |                                                              |                                                                                                                                                                                                                                                                                                                                                                                                                                                                                                                                                                                                                                                                                                                                                                                              |    |
|-------------|--------------------------------------------------------------|----------------------------------------------------------------------------------------------------------------------------------------------------------------------------------------------------------------------------------------------------------------------------------------------------------------------------------------------------------------------------------------------------------------------------------------------------------------------------------------------------------------------------------------------------------------------------------------------------------------------------------------------------------------------------------------------------------------------------------------------------------------------------------------------|----|
|             |                                                              | receiving part of a process that fulfills the previously agreed upon requirements.                                                                                                                                                                                                                                                                                                                                                                                                                                                                                                                                                                                                                                                                                                           |    |
| ICO:0000001 | informed consent form                                        | A document that explains all relevant information to assist a human being in understanding the expectations and requirements of participation in a process, and is an instrument in obtaining consent and, after having obtained consent, is a record that such a consent has occurred.                                                                                                                                                                                                                                                                                                                                                                                                                                                                                                      | -- |
| ICO:0000019 | signature section                                            | A document part that is specified as a place to receive a signature.                                                                                                                                                                                                                                                                                                                                                                                                                                                                                                                                                                                                                                                                                                                         | -- |
| ICO:0000060 | act of storing a specimen                                    | A planned process that involves placing a specimen in some location in order to maintain possession of it.                                                                                                                                                                                                                                                                                                                                                                                                                                                                                                                                                                                                                                                                                   | -- |
| ICO:0000074 | authorization for release of confidential health information | An act of authorizing that is signed by a patient, or his legal representative, or clinical study participant for the use or disclosure of oral, written, or electronic form of confidential health information that identifies the individual and relates to the medical history, diagnosis, treatment, or prognosis of his condition.                                                                                                                                                                                                                                                                                                                                                                                                                                                      | -- |
| ICO:0000079 | institutional review board***                                | A specially constituted organization comprised of medical, scientific and non-scientific members established and designated by an entity to ensure the protection of the rights, safety and well-being of human subjects recruited to participate in biomedical or behavioral research according to the requirements outlined in Title 38, part 16 (same as Title 45, part 46 and Title 21, part 56) of the U.S. Code of Federal Regulations. IRB responsibility include but not limited to the reviewing, approving, and providing continuing review of trial protocol and amendments and of the methods and material to be used in obtaining and documenting informed consent of the trial. Other equivalent committees with the same or similar functions are also considered to be IRBs. | -- |
| ICO:0000081 | legal guardian role***                                       | A role that inheres in an individual who is authorized under applicable State or local law to consent on behalf of a child or incapable person to general medical care including participation in clinical research.                                                                                                                                                                                                                                                                                                                                                                                                                                                                                                                                                                         | -- |
| ICO:0000083 | individually identifiable health information entity***       | A protected health information entity which identifies an individual; or with respect to which there is a reasonable basis to believe the information can be used to identify an individual.                                                                                                                                                                                                                                                                                                                                                                                                                                                                                                                                                                                                 | -- |

|             |                                          |                                                                                                                                                                                                                                                                                                                                                                                                                                                         |                                                                                               |
|-------------|------------------------------------------|---------------------------------------------------------------------------------------------------------------------------------------------------------------------------------------------------------------------------------------------------------------------------------------------------------------------------------------------------------------------------------------------------------------------------------------------------------|-----------------------------------------------------------------------------------------------|
| ICO:0000086 | consenter role                           | A role that inheres in a patient or the legal guardian when he/she participates the consenting process.                                                                                                                                                                                                                                                                                                                                                 | --                                                                                            |
| ICO:0000101 | health information entity***             | An information content entity which is created or received by a health care provider, health plan, public health authority, employer, life insurer, school or university, or health care clearinghouse; and relates to the past, present, or future physical or mental health or condition of any individual, the provision of health care to an individual, or the past, present, or future payment for the provision of health care to an individual. | --                                                                                            |
| ICO:0000103 | protected health information entity      | A health information entity which is created, received, stored, or transmitted by covered entities and their business associates in relation to the provision of healthcare, healthcare operations and payment for healthcare services.                                                                                                                                                                                                                 | --                                                                                            |
| ICO:0000113 | anonymized information content entity    | An information content entity that has been processed to prevent the identification of the person with whom the data are associated, thereby enduring in a stasis of anonymization.                                                                                                                                                                                                                                                                     | --                                                                                            |
| ICO:0000116 | act of using participant data            | A planned process that involves using data which was an output of a human being's participation in a study and which is about that human being.                                                                                                                                                                                                                                                                                                         | Incorrect level of abstraction. Created new parent (ICO:0000421); see Table 5.                |
| ICO:0000181 | secondary use***                         | A planned process that involves a human biological specimen originally collected for the purpose of treatment or a different investigation.                                                                                                                                                                                                                                                                                                             |                                                                                               |
| ICO:0000186 | permission temporal region               | A temporal region during which some act is permitted.                                                                                                                                                                                                                                                                                                                                                                                                   |                                                                                               |
| ICO:0000196 | act of informed consenting               | An act of permitting that is a process part of some informed consent process.                                                                                                                                                                                                                                                                                                                                                                           | 'Act of Authorizing' is now a social act. Ongoing deliberation if also a deontic declaration. |
| ICO:0000199 | permission role                          | A deontic role that inheres in an agent and which permits certain actions.                                                                                                                                                                                                                                                                                                                                                                              | --                                                                                            |
| ICO:0000218 | act of removing identifiable information | An act of anonymization that alters an information content entity by removing information content which identifies that individual.                                                                                                                                                                                                                                                                                                                     | --                                                                                            |
| ICO:0000222 | signature                                | An information content entity that is a handwritten depiction of a name.                                                                                                                                                                                                                                                                                                                                                                                | --                                                                                            |
| ICO:0000228 | act of data sharing                      | a planned process in which data possessed by one person or organization is shared with one or more other persons or organizations.                                                                                                                                                                                                                                                                                                                      | --                                                                                            |
| ICO:0000233 | regulatory document                      | A document that either prescribes actions or prescribes the permissions, obligations,                                                                                                                                                                                                                                                                                                                                                                   | --                                                                                            |

|                |                                  |                                                                                                                                                                                    |                                                                                                                                 |
|----------------|----------------------------------|------------------------------------------------------------------------------------------------------------------------------------------------------------------------------------|---------------------------------------------------------------------------------------------------------------------------------|
|                |                                  | restrictions, or protections relating to public or legal policy.                                                                                                                   |                                                                                                                                 |
| ICO:0000244    | permission directive             | A directive information entity that prescribes a deontic role that permits some action.                                                                                            | --                                                                                                                              |
| ICO:0000245    | conditional permission directive | A conditional specification that prescribes a permission, should some trigger condition obtain.                                                                                    | Marked as obsolete and replaced with 'permission condition directive' (ICO:0000327).                                            |
| ICO:0000248    | obligation directive***          | A directive information entity that prescribes an obligation that is realized a deontic role that is the output of a document act.                                                 | --                                                                                                                              |
| ICO:0000268    | confidentiality directive***     | A directive information entity that prescribes the nondisclosure of information.                                                                                                   | --                                                                                                                              |
| ICO:0000290    | waiver document***               | A document designed for the purpose of assisting in an act of waiving, and which contains both some description of waiver and some waiver directive.                               | --                                                                                                                              |
| ICO:0000307    | waiver directive***              | A directive information entity that prescribes an act of waiving.                                                                                                                  | --                                                                                                                              |
| ICO:0000311    | act of genetic testing           | A planned process that involves the investigation of some sequence of DNA.                                                                                                         | --                                                                                                                              |
| ICO:0000312    | genetic testing directive        | A directive information entity that prescribes some act of genetic testing.                                                                                                        | --                                                                                                                              |
| ICO:0000313    | excess material role             | A role inhering in some material entity that is realized in an act of artifact modification.                                                                                       | Revised text definition: "...of artifact modification where the material entity is separated from another portion of material." |
| LABO:0000107   | laboratory test                  | A measurement assay that has as input a specimen derived from an organism and that aims as having as output a data item that is about an entity related to the specimen.           | --                                                                                                                              |
| NCBITaxon:9606 | homo sapiens                     | The bipedal primate mammal, Homo sapiens; belonging to man or mankind; pertaining to man or to the race of man; use of man as experimental subject or unit of analysis in research | --                                                                                                                              |
| OBI:0000011    | planned process                  | A processual entity that realizes a plan which is the concretization of a plan specification.                                                                                      | --                                                                                                                              |
| OBI:0000066    | investigation                    | a planned process that consists of parts: planning, study design execution, documentation and which produce conclusion(s).                                                         | --                                                                                                                              |
| OBI:0000093    | patient role                     | A role which inheres in a person and is realized by the process of being under the care of a physician or health care provider                                                     | --                                                                                                                              |

|                                     |                             |                                                                                                                                                                                                                                                                                                                                                                                                |                                                                                             |
|-------------------------------------|-----------------------------|------------------------------------------------------------------------------------------------------------------------------------------------------------------------------------------------------------------------------------------------------------------------------------------------------------------------------------------------------------------------------------------------|---------------------------------------------------------------------------------------------|
| OBI:0000112                         | specimen role               | A role borne by a material entity that is gained during a specimen collection process and that can be realized by use of the specimen in an investigation.                                                                                                                                                                                                                                     | --                                                                                          |
| OBI:0000202                         | investigation agent role*** | A role borne by an entity and that is realized in a process that is part of an investigation in which an objective is achieved. These processes include, among others: planning, overseeing, funding, reviewing.                                                                                                                                                                               | --                                                                                          |
| OBI:0000245                         | organization                | An entity that can bear roles, has members, and has a set of organization rules. Members of organizations are either organizations themselves or individual people. Members can bear specific organization member roles that are determined in the organization rules. The organization rules also determine how decisions are made on behalf of the organization by the organization members. | --                                                                                          |
| OBI:0000659                         | specimen collection process | A planned process with the objective of collecting a specimen.                                                                                                                                                                                                                                                                                                                                 | --                                                                                          |
| OBI:0001769                         | specimen collector role     | An Investigation agent role borne by a person or organization which is realized in a specimen collection process.                                                                                                                                                                                                                                                                              | --                                                                                          |
| OBI:0100051                         | specimen                    | A material entity that has the specimen role.                                                                                                                                                                                                                                                                                                                                                  | --                                                                                          |
| OGMS:0000018                        | laboratory finding          | A representation of a quality of a specimen that is the output of a laboratory test and that can support an inference to an assertion about some quality of the patient.                                                                                                                                                                                                                       | --                                                                                          |
| OGMS:0000090                        | treatment                   | A planned process whose completion is hypothesized by a health care provider to eliminate, prevent, or alleviate the signs and symptoms of a disorder or pathological process                                                                                                                                                                                                                  | Recommendation to OGMS: 'Treatment' as a child of 'Health Care Process' instead of sibling. |
| <b>Source Ontologies: Relations</b> |                             |                                                                                                                                                                                                                                                                                                                                                                                                |                                                                                             |
| BFO:0000051                         | has part                    | <i>A core relation that holds between a whole and its part</i>                                                                                                                                                                                                                                                                                                                                 | --                                                                                          |
| BFO:0000054                         | realized in                 | <i>To say that b realizes c at t is to assert that there is some material entity d &amp; b is a process which has participant d at t &amp; c is a disposition or role of which d is bearer_of at t&amp; the type instantiated by b is correlated with the type instantiated by c.</i>                                                                                                          | --                                                                                          |
| CommonCore Ontologies/ prescribes   | prescribes                  | <i>For all types T1 and T2, if T1 prescribes T2, then there is some instance of T1, t1, that serves as a rule or guide to some instance of T2, t2 (if T2 is a type of bfo:Occurrent) or that serves as a model for some instance of T2, t2 (if T2 is a type of bfo:Continuant)</i>                                                                                                             | --                                                                                          |

|             |                        |                                                                                                                                                                                                                                                                                          |    |
|-------------|------------------------|------------------------------------------------------------------------------------------------------------------------------------------------------------------------------------------------------------------------------------------------------------------------------------------|----|
| DUO:0000010 | is restricted to       | <i>A is restricted to B iff A is a consent code and B is an investigation and A may only participate in instances of a class C, of which B is an instance.</i>                                                                                                                           | -- |
| IAO:0000136 | is about               | is:about is a (currently) primitive relation that relates an information artifact to an entity.                                                                                                                                                                                          | -- |
| OBI:0000293 | has:specified:input    | <i>A relation between a planned process and a continuant participating in that process that is not created during the process. The presence of the continuant during the process is explicitly specified in the plan specification which the process realizes the concretization of.</i> | -- |
| OBI:0000295 | is:specified:input:of  | <i>A relation between a planned process and a continuant participating in that process that is not created during the process. The presence of the continuant during the process is explicitly specified in the plan specification which the process realizes the concretization of.</i> | -- |
| OBI:0000299 | has:specified:output   | <i>A relation between a planned process and a continuant participating in that process. The presence of the continuant at the end of the process is explicitly specified in the objective specification which the process realizes the concretization of.</i>                            | -- |
| OBI:0000312 | is:specified:output:of | <i>A relation between a planned process and a continuant participating in that process. The presence of the continuant at the end of the process is explicitly specified in the objective specification which the process realizes the concretization of.</i>                            | -- |
| RO:0000053  | bearer of              | <i>A relation between an independent continuant (the bearer) and a specifically dependent continuant (the dependent), in which the dependent specifically depends on the bearer for its existence</i>                                                                                    | -- |
| RO:0000056  | participates in        | <i>A relation between a continuant and a process, in which the continuant is somehow involved in the process</i>                                                                                                                                                                         | -- |
| RO:0002350  | member of              | Is member of is a mereological relation between a [sic] item and a collection.                                                                                                                                                                                                           | -- |

Table A2. Terms from OBO Foundry Ontologies (and not in ICO) – including PURLs, Labels, Definitions, and Proposed Revisions and Comments – Used to Express Permissions Identified in the Source Data. Note: \*\*\* in the Ontology Label column denotes that the given term was identified through the review of US Federal Regulations via the literature. All other terms were first identified from permission-sentences from clinical consent forms.

| Ontology PURL                     | Ontology Label                | Ontology Definition                                                                                                                                                                                                                                                                                                                       | Parent Term (Label and PURL)            | Recommendations and Comments                                                                                             |
|-----------------------------------|-------------------------------|-------------------------------------------------------------------------------------------------------------------------------------------------------------------------------------------------------------------------------------------------------------------------------------------------------------------------------------------|-----------------------------------------|--------------------------------------------------------------------------------------------------------------------------|
| <b>Source Ontologies: Classes</b> |                               |                                                                                                                                                                                                                                                                                                                                           |                                         |                                                                                                                          |
| CHMO:0002832                      | material disposal             | A planned process in which materials for an experiment are removed permanently from the laboratory.                                                                                                                                                                                                                                       | waste management (CHMO:0002845)         | Imported (including parent classes). Recommendation adopted by CHMO: delete 'for an experiment' and add 'or repository'. |
| ERO:0000333                       | video                         | Data containing moving pictures stored in digital and analog formats.                                                                                                                                                                                                                                                                     | data format specification (IAO:0000098) | Imported.                                                                                                                |
| GEO:00000400                      | government organization***    | An organization that governs the people living in a particular geographical region or aggregate of geographical regions. The geographical region it governs can change over time (such as the westward expansion of the United States and the addition of Hawaii). Note: this definition was taken over from "geopolitical organization". | organization (OBI:0000245)              | Imported.                                                                                                                |
| NCIT:C13235                       | fetus                         | An unborn or unhatched vertebrate in the later stages of development showing the main recognizable features of the mature being.                                                                                                                                                                                                          | --                                      |                                                                                                                          |
| NCIT:C15380                       | telemedicine                  | The use of telecommunications technology to provide, enhance, or expedite health care services, as by accessing off-site databases, linking clinics or physicians' offices to central hospitals, or transmitting x-rays or other diagnostic images for examination at another site.                                                       | --                                      |                                                                                                                          |
| NCIT:C142640                      | postmarketing surveillance*** | Programs to identify adverse events that did not appear during the drug approval process.                                                                                                                                                                                                                                                 | --                                      | All NCIT terms submitted to ICO issue tracker for import and new parent hierarchies.                                     |
| NCIT:C163409                      | safety monitoring             | Review of safety data to ensure safety of the individuals who are participating in the study, or to identify potential safety concerns for the duration of the study lifecycle.                                                                                                                                                           | --                                      | Additionally, recommend importing all age group and at-risk population classes.                                          |
| NCIT:C16423                       | child                         | An age group comprised of individuals who are not yet an                                                                                                                                                                                                                                                                                  | --                                      |                                                                                                                          |

|             |                                        |                                                                                                                                                                                                                                                                      |                                                   |                                                                                                  |
|-------------|----------------------------------------|----------------------------------------------------------------------------------------------------------------------------------------------------------------------------------------------------------------------------------------------------------------------|---------------------------------------------------|--------------------------------------------------------------------------------------------------|
|             |                                        | adult. The specific cut-off age will vary by purpose.                                                                                                                                                                                                                |                                                   |                                                                                                  |
| NCIT:C43960 | health care organization               | An organization that provides healthcare services or that is involved in the provision of health care activities. Groupings or subdivisions of an organization, such as departments, may also be considered as organizations where there is a need to identify them. | --                                                |                                                                                                  |
| NCIT:C54131 | company                                | Any formal business entity for profit, which may be a corporation, a partnership, association or individual proprietorship.                                                                                                                                          | --                                                |                                                                                                  |
| NCIT:C64262 | biologic sample preservation procedure | Procedures utilized to save organic substances from decay. Some preservation procedures are meant to maintain cells, tissues, or organisms in a viable state.                                                                                                        | --                                                |                                                                                                  |
| OBI:0001305 | genotype information***                | a genetic characteristics information that is about the genetic material of an organism and minimally includes information about the genetic background and can in addition contain information about specific alleles, genetic modifications, etc.                  | genetic characteristics information (OBI:0001404) | Imported (including parent classes).                                                             |
| OBI:0000145 | pathologist role                       | a worker role of being responsible for making the histopathology diagnoses associated with data from a study; this activity occurs outside the study timeline                                                                                                        | --                                                | NOT imported (consensus).                                                                        |
| OBI:0000207 | health care provider role              | A worker role of providing medical care either within or outside the study timeline                                                                                                                                                                                  | --                                                | NOT imported (consensus).<br>Action by OBI: Class obsoleted in favor of adopting OMRSE_00000012. |
| OBI:0600003 | performing a clinical assessment       | A protocol application during which a series of tests are made of a patient leading to determination of disease state, or condition.                                                                                                                                 | --                                                | NOT imported (consensus).                                                                        |
| OBI:0000039 | blood specimen on blood spot card***   | A blood specimen that is located on a blood spot card.                                                                                                                                                                                                               | processed specimen (OBI:0000953 )                 | Imported.                                                                                        |

|                 |                                               |                                                                                                                                                                                                                                                                                 |                                                         |                                                         |
|-----------------|-----------------------------------------------|---------------------------------------------------------------------------------------------------------------------------------------------------------------------------------------------------------------------------------------------------------------------------------|---------------------------------------------------------|---------------------------------------------------------|
| OGMS:0000096    | health care process                           | A planned process with the objective to improve the health status of a patient that directly involves the treatment, diagnosis, or prevention of disease or injury of a patient                                                                                                 | planned process (OBI:0000011)                           | Imported.                                               |
| OGMS:0000104    | diagnostic process                            | A health care process that involves the interpretation of a clinical picture from a given patient (input) and the assertion to the effect that the patient has a disease, disorder, or syndrome of a certain type, or none of these (output).                                   | health care process (OGMS:0000096)                      | Imported.                                               |
| OMIABIS:0000010 | biobank organization***                       | An organization bearing legal personality that owns or administrates a biobank.                                                                                                                                                                                                 | organization (OBI:0000245)                              | Imported.                                               |
| OMRSE:00000012  | health care provider role                     | A human health care role inhering in an organization or human being that is realized by a process of providing health care services to an organism.                                                                                                                             | human health care role (OMRSE:00000010)                 | To be considered for import in a future release of ICO. |
| OMRSE:00000087  | employer role***                              | a role in human social processes that is realized when the bearer provides a wage or salary in exchange for some labor or services as specified by some declaration                                                                                                             | role in human social processes (OMRSE:00000024)         | Imported.                                               |
| OMRSE:00000093  | insurance company***                          | An organization that secures a group of people against pecuniary loss by payment of a sum of money if a specified event occurs.                                                                                                                                                 | organization (OBI:0000245)                              | Imported.                                               |
| OMRSE:00000198  | information content entity-request process*** | a communication in which some participant requests of some other participant an information content entity about some portion of reality                                                                                                                                        | communication (OMRSE:00000192)                          | Imported (including parent classes).                    |
| OMRSE:00000054  | hospital role                                 | A healthcare provider role that inheres in an organization and is realized by providing inpatient and outpatient care.                                                                                                                                                          | health care provider organization role (OMRSE:00000015) | Imported (including parent classes).                    |
| OMRSE:00000056  | hospital organization                         | An organization that is the bearer of a hospital role.                                                                                                                                                                                                                          | organization (OBI:0000245)                              | Imported (including parent classes).                    |
| OMRSE:00002029  | education process                             | A planned process with an active participant who acquires mental representations of information content entities (ICEs), which had no previous mental representation in the cognitive system, and through repeated use or application of these ICEs becomes the bearer of a new | planned process (OBI:0000011)                           | Imported.                                               |

|             |                      |                                                                                                                                     |                                                                        |
|-------------|----------------------|-------------------------------------------------------------------------------------------------------------------------------------|------------------------------------------------------------------------|
|             |                      | instance of some type of capability, and the participant was not previously the bearer of that instance of that type of capability. |                                                                        |
| XCO:0000527 | genetic manipulation | A condition in which the genotype or the gene expression of an organism or a cell has been modified.                                | -- Submitted to ICO issue tracker for import and new parent hierarchy. |

Table A3. Proposed/New Terms Necessary to Express Permissions Identified in the Source Data. Note: \*\*\* in the Ontology Label column denotes that the given term was identified through the review of US Federal Regulations via the literature. All other terms were first identified from permission-sentences from clinical consent forms.

| Proposed Label                 | Proposed Definition                                                                                                                                                                                                                                                                    | Parent Term (Label and PURL)                      | Comments and Citations                                                        |
|--------------------------------|----------------------------------------------------------------------------------------------------------------------------------------------------------------------------------------------------------------------------------------------------------------------------------------|---------------------------------------------------|-------------------------------------------------------------------------------|
| <b>Classes</b>                 |                                                                                                                                                                                                                                                                                        |                                                   |                                                                               |
| owner role                     | A role in a human social process that is that is based on a social act and whose bearer exercises exclusive control over a property, where this control is permitted by one or more deontic roles, which are parts of the ownership role.                                              | deontic role (IAO:0021008)                        | Created in the Document Acts Ontology (IAO:0020027)                           |
| temporal restriction directive | A 'permission restriction directive' that designates the temporal boundaries of the 'designated action'.                                                                                                                                                                               | deontic role (IAO:0021008)                        | Created (ICO:0000363)                                                         |
| act of data use                | A planned process in which data is put to some use by an entity.                                                                                                                                                                                                                       | planned process (OBI:0000011)                     | Created (ICO:0000421)                                                         |
| act of selling***              | A planned process in which goods or services are exchanged for money ("Sell," 2020).                                                                                                                                                                                                   | planned process (OBI:0000011)                     | Created (ICO:0000423)                                                         |
| covered entity role***         | A role based on the Health Insurance Portability and Accountability Act that inheres in individuals, organizations, and agencies that are also health care providers, health plans, or health care clearinghouse ( <i>HIPAA Administrative Simplification Regulation Text</i> , 2013). | role (BFO:0000023)                                | Created (ICO:0000424)                                                         |
| data recipient role***         | A role which is realized in processes of data disclosure ( <i>Article 4 EU GDPR "Definitions,"</i> 2020).                                                                                                                                                                              | role (BFO:0000023)                                | Created (ICO:0000425)                                                         |
| limited data set***            | Protected health information that excludes HIPAA-specified identifiers of the individual or of relatives, employers, or household members of the individual ( <i>HIPAA Administrative Simplification Regulation Text</i> , 2013).                                                      | protected health information entity (ICO:0000103) | Created (ICO:0000426)                                                         |
| owner role directive           | A directive information entity that prescribes the owner role.                                                                                                                                                                                                                         | directive information entity (IAO:0000033)        | Created (ICO:0000427)                                                         |
| ownership stasis               | A stasis in which an entity bears an ownership role.                                                                                                                                                                                                                                   | Stasis (CommonCore Ontologies/ Stasis)            | Created (ICO:0000428)                                                         |
| residual clinical biospecimen  | A material entity, collected during some health care process, that bears both a specimen role and an excess material role following some act of artifact modification.                                                                                                                 | material entity (BFO:0000040)                     | Created (ICO:0000429)                                                         |
| graphic illustration           | Proposed: "Works consisting of photographs, prints, drawings, portraits, plates, diagrams, facsimiles, maps, tables, or other representations or systematic arrangements of data designed to elucidate or decorate the contents of a                                                   | --                                                | Submitted to ICO issue tracker for deliberation regarding definitions, parent |

|                                |                                                                                                                                                                                                                            |    |                                     |
|--------------------------------|----------------------------------------------------------------------------------------------------------------------------------------------------------------------------------------------------------------------------|----|-------------------------------------|
|                                | publication” (definition from MeSH Code: D019489) (Bodenreider, 2004; “Book Illustrations (Product),” 2020).                                                                                                               |    | hierarchies, and source ontologies. |
| prospective data collection*** | Proposed: “A study design in which the documentation of the presence or absence of an exposure of interest is documented at a time period preceding the onset of the condition being studied” (“Prospective Study,” 2010). | -- |                                     |

## Supplemental References

*Article 4 EU GDPR “Definitions.”* (2020, May 28). PrivazyPlan; SecureDataService.

<https://www.privacy-regulation.eu/en/article-4-definitions-GDPR.htm>

Bodenreider, O. (2004). The Unified Medical Language System (UMLS): Integrating biomedical terminology. *Nucleic Acids Research*, 32, 267–270. <https://doi.org/10.1093/nar/gkh061>

Book Illustrations (product). (2020). In *UMLS Metathesaurus Browser*. U.S. National Library of Medicine. <https://uts.nlm.nih.gov/uts/umls/concept/C0376653>

*HIPAA Administrative Simplification Regulation Text* (45 CFR Parts 160, 162, and 164). (2013).

U.S. Department of Health and Human Services Office for Civil Rights.

Prospective Study. (2010). In N. Salkind, *Encyclopedia of Research Design*. SAGE Publications, Inc. <https://doi.org/10.4135/9781412961288.n342>

Sell. (2020). In *Merriam-Webster*. <https://www.merriam-webster.com/dictionary/sell>

## Appendix B: Terms Used to Express Permission-Sentences in Clinical Consent Forms

Table B1. Terms and Sentence References to Express the Permission-Sentence: “By signing this form, I am requesting and giving my consent for MHSM and the doctors and/or nurses to give me blood and/o blood products during this admission or series of treatments.”

| By signing this form, I am requesting and giving my consent for MHSM and the doctors and/or nurses to give me blood and/o blood products during this admission or series of treatments. |                                |                                                  |
|-----------------------------------------------------------------------------------------------------------------------------------------------------------------------------------------|--------------------------------|--------------------------------------------------|
| Ontology PURL                                                                                                                                                                           | Ontology Label                 | Sentence Reference                               |
| <b>Classes</b>                                                                                                                                                                          |                                |                                                  |
| ICO:0000001                                                                                                                                                                             | informed consent form          | 'this form'                                      |
| ICO:0000019                                                                                                                                                                             | signature section              | 'By signing this form'                           |
| ICO:0000086                                                                                                                                                                             | consenter role                 | 'I am requesting'                                |
| ICO:0000186                                                                                                                                                                             | permission temporal region     | 'during this admission or series of treatments'  |
| ICO:0000196                                                                                                                                                                             | act of informed consenting     | 'I am requesting'                                |
| ICO:0000199                                                                                                                                                                             | permission role                | 'consent for MHSM and the doctors and/or nurses' |
| ICO:0000222                                                                                                                                                                             | signature                      | 'By signing this form'                           |
| ICO:0000244                                                                                                                                                                             | permission directive           | <i>entire sentence</i>                           |
| ICO:0000363                                                                                                                                                                             | temporal restriction directive | 'during this admission or series of treatments'  |
| NCBITaxon:9606                                                                                                                                                                          | homo sapiens                   | 'I, 'me', 'doctors and/or nurses'                |
| OBI:0000093                                                                                                                                                                             | patient role                   | 'to give me blood'                               |
| OBI:0000207                                                                                                                                                                             | health care provider role      | 'doctors and/or nurses'                          |
| OBI:0000245                                                                                                                                                                             | organization                   | 'MHSM'                                           |
| OGMS:0000090                                                                                                                                                                            | treatment                      | 'give me blood and/or blood products'            |
| OGMS:0000096                                                                                                                                                                            | health care process            | 'give me blood and/or blood products'            |
| OMRSE:00000054                                                                                                                                                                          | hospital role                  | 'MHSM'                                           |
| OMRSE:00000056                                                                                                                                                                          | hospital organization          | 'MHSM'                                           |
| <b>Relations</b>                                                                                                                                                                        |                                |                                                  |
| BFO:0000051                                                                                                                                                                             | has part                       |                                                  |
| BFO:0000054                                                                                                                                                                             | realized in                    |                                                  |
| CommonCore Ontologies/prescribes                                                                                                                                                        | prescribes                     |                                                  |
| DUO:0000010                                                                                                                                                                             | is restricted to               |                                                  |
| OBI:0000293                                                                                                                                                                             | has:specified:input            |                                                  |
| RO:0000053                                                                                                                                                                              | bearer of                      |                                                  |
| RO:0000056                                                                                                                                                                              | participates in                |                                                  |
| RO:0002350                                                                                                                                                                              | member of                      |                                                  |

Table B2. Terms and Sentence References to Express the Permission-Sentence: “Your signature below indicates that you understand to your satisfaction the information about the genetic testing ordered by your health care provider and that you consent to having this testing performed.”

| Your signature below indicates that you understand to your satisfaction the information about the genetic testing ordered by your health care provider and that you consent to having this testing performed. |                            |                                                                               |
|---------------------------------------------------------------------------------------------------------------------------------------------------------------------------------------------------------------|----------------------------|-------------------------------------------------------------------------------|
| Ontology PURL                                                                                                                                                                                                 | Ontology Label             | Sentence Reference                                                            |
| <b>Classes</b>                                                                                                                                                                                                |                            |                                                                               |
| ICO:0000001                                                                                                                                                                                                   | informed consent form      | 'signature below'                                                             |
| ICO:0000019                                                                                                                                                                                                   | signature section          | 'signature below'                                                             |
| ICO:0000086                                                                                                                                                                                                   | consenter role             | 'your signature below indicates... consent'                                   |
| ICO:0000196                                                                                                                                                                                                   | act of informed consenting | 'your signature below indicates... consent'                                   |
| ICO:0000199                                                                                                                                                                                                   | permission role            | 'that you consent to having this testing performed'                           |
| ICO:0000222                                                                                                                                                                                                   | signature                  | 'signature below'                                                             |
| ICO:0000244                                                                                                                                                                                                   | permission directive       | <i>entire sentence</i>                                                        |
| ICO:0000311                                                                                                                                                                                                   | act of genetic testing     | 'genetic testing'                                                             |
| ICO:0000312                                                                                                                                                                                                   | genetic testing directive  | 'consent to having this testing performed'                                    |
| NCBITaxon:9606                                                                                                                                                                                                | homo sapiens               | 'your', 'health care provider'                                                |
| OBI:0000093                                                                                                                                                                                                   | patient role               | 'ordered by your health care provider' and 'to having this testing performed' |
| OBI:0000207                                                                                                                                                                                                   | health care provider role  | 'health care provider'                                                        |
| <b>Relations</b>                                                                                                                                                                                              |                            |                                                                               |
| BFO:0000051                                                                                                                                                                                                   | has part                   |                                                                               |
| BFO:0000054                                                                                                                                                                                                   | realized in                |                                                                               |
| CommonCore Ontologies/prescribes                                                                                                                                                                              | prescribes                 |                                                                               |
| RO:0000053                                                                                                                                                                                                    | bearer of                  |                                                                               |
| RO:0000056                                                                                                                                                                                                    | participates in            |                                                                               |

Table B3. Terms and Sentence References to Express the Permission-Sentence: “I consent to the Facility videotaping, photographing, video monitoring, or taking other recordings of me or parts of my body for diagnosis, treatment, research, or patient safety purposes.”

| I consent to the Facility videotaping, photographing, video monitoring, or taking other recordings of me or parts of my body for diagnosis, treatment, research, or patient safety purposes. |                            |                                                                            |
|----------------------------------------------------------------------------------------------------------------------------------------------------------------------------------------------|----------------------------|----------------------------------------------------------------------------|
| Ontology PURL                                                                                                                                                                                | Ontology Label             | Sentence Reference                                                         |
| <b>Classes</b>                                                                                                                                                                               |                            |                                                                            |
| BFO:0000040                                                                                                                                                                                  | material entity            | 'videotaping, photographing, video monitoring, or taking other recordings' |
| DUO:0000001                                                                                                                                                                                  | data use limitation        | 'for diagnosis, treatment, research, or patient safety purposes'           |
| ERO:0000333                                                                                                                                                                                  | video                      | 'videotaping', 'video monitoring'                                          |
| IAO:0000030                                                                                                                                                                                  | information content entity | 'videotaping, photographing, video monitoring, or taking other recordings' |
| IAO:0000185                                                                                                                                                                                  | photograph                 | photographing'                                                             |
| IAO:0000572                                                                                                                                                                                  | documenting                | 'videotaping, photographing, video monitoring, or taking other recordings' |
| ICO:0000001                                                                                                                                                                                  | informed consent form      | <i>Implicit</i>                                                            |
| ICO:0000086                                                                                                                                                                                  | consenter role             | 'I consent to'                                                             |
| ICO:0000196                                                                                                                                                                                  | act of informed consenting | 'I consent to'                                                             |
| ICO:0000199                                                                                                                                                                                  | permission role            | 'I consent to'                                                             |
| ICO:0000244                                                                                                                                                                                  | permission directive       | <i>entire sentence</i>                                                     |
| NCBITaxon:9606                                                                                                                                                                               | homo sapiens               | 'I'                                                                        |
| NCIT:C163409                                                                                                                                                                                 | safety monitoring          | 'patient safety purposes'                                                  |
| NCIT:C43960                                                                                                                                                                                  | health care organization   | 'the facility'                                                             |
| OBI:0000066                                                                                                                                                                                  | investigation              | 'research'                                                                 |
| OBI:0000093                                                                                                                                                                                  | patient role               | 'for diagnosis, treatment, ...'                                            |
| OBI:0000245                                                                                                                                                                                  | organization               | 'the facility'                                                             |
| OGMS:0000090                                                                                                                                                                                 | treatment                  | 'treatment'                                                                |
| OGMS:0000096                                                                                                                                                                                 | health care process        | 'I consent to'                                                             |
| OGMS:0000104                                                                                                                                                                                 | diagnostic process         | 'diagnosis'                                                                |
| <b>Relations</b>                                                                                                                                                                             |                            |                                                                            |
| BFO:0000051                                                                                                                                                                                  | has part                   |                                                                            |
| BFO:0000054                                                                                                                                                                                  | realized in                |                                                                            |
| CommonCore Ontologies/prescribes                                                                                                                                                             | prescribes                 |                                                                            |
| OBI:0000295                                                                                                                                                                                  | is:specified:input:of      |                                                                            |
| OBI:0000299                                                                                                                                                                                  | has:specified:output       |                                                                            |
| RO:0000053                                                                                                                                                                                   | bearer of                  |                                                                            |
| RO:0000056                                                                                                                                                                                   | participates in            |                                                                            |

Table B4. Terms and Sentence References to Express the Permission-Sentence: “I hereby consent to the use and disclosure of my protected health information as described in the Notice of Privacy Practices.”

| I hereby consent to the use and disclosure of my protected health information as described in the Notice of Privacy Practices. |                                                              |                                                                                 |
|--------------------------------------------------------------------------------------------------------------------------------|--------------------------------------------------------------|---------------------------------------------------------------------------------|
| Ontology PURL                                                                                                                  | Ontology Label                                               | Sentence Reference                                                              |
| <b>Classes</b>                                                                                                                 |                                                              |                                                                                 |
| ICO:0000001                                                                                                                    | informed consent form                                        | <i>Implicit</i>                                                                 |
| ICO:0000074                                                                                                                    | authorization for release of confidential health information | 'I hereby consent to the use and disclosure of my protected health information' |
| ICO:0000086                                                                                                                    | consenter role                                               | 'I hereby consent to'                                                           |
| ICO:0000103                                                                                                                    | protected health information entity                          | 'protected health information'                                                  |
| ICO:0000116                                                                                                                    | act of using participant data                                | 'use'                                                                           |
| ICO:0000196                                                                                                                    | act of informed consenting                                   | 'I hereby consent to'                                                           |
| ICO:0000199                                                                                                                    | permission role                                              | 'consent to the use and disclosure of'                                          |
| ICO:0000228                                                                                                                    | act of data sharing                                          | 'disclosure'                                                                    |
| ICO:0000233                                                                                                                    | regulatory document                                          | 'Notice of Privacy Practices'                                                   |
| ICO:0000244                                                                                                                    | permission directive                                         | <i>entire sentence</i>                                                          |
| NCBITaxon:9606                                                                                                                 | homo sapiens                                                 | 'I, 'my'                                                                        |
| OBI:0000093                                                                                                                    | patient role                                                 | 'I, 'my protected health information'                                           |
| <b>Relations</b>                                                                                                               |                                                              |                                                                                 |
| BFO:0000051                                                                                                                    | has part                                                     |                                                                                 |
| BFO:0000054                                                                                                                    | realized in                                                  |                                                                                 |
| CommonCore Ontologies/prescribes                                                                                               | prescribes                                                   |                                                                                 |
| IAO:0000136                                                                                                                    | is about                                                     |                                                                                 |
| OBI:0000295                                                                                                                    | is:specified:input:of                                        |                                                                                 |
| RO:0000053                                                                                                                     | bearer of                                                    |                                                                                 |
| RO:0000056                                                                                                                     | participates in                                              |                                                                                 |

Table B5. Terms and Sentence References to Express the Permission-Sentence: “I hereby authorize XXX to retain, preserve and use for scientific or teaching purposes, or to dispose at its discretion or convenience, any specimen or tissues taken from my body during my visit.”

| I hereby authorize XXX to retain, preserve and use for scientific or teaching purposes, or to dispose at its discretion or convenience, any specimen or tissues taken from my body during my visit. |                                        |                                       |
|-----------------------------------------------------------------------------------------------------------------------------------------------------------------------------------------------------|----------------------------------------|---------------------------------------|
| Ontology PURL                                                                                                                                                                                       | Ontology Label                         | Sentence Reference                    |
| <b>Classes</b>                                                                                                                                                                                      |                                        |                                       |
| CHMO:0002832                                                                                                                                                                                        | material disposal                      | 'to dispose'                          |
| ICO:0000001                                                                                                                                                                                         | informed consent form                  | <i>Implicit</i>                       |
| ICO:0000060                                                                                                                                                                                         | act of storing a specimen              | 'to retain'                           |
| ICO:0000086                                                                                                                                                                                         | consenter role                         | 'I hereby authorize'                  |
| ICO:0000186                                                                                                                                                                                         | permission temporal region             | 'during my visit'                     |
| ICO:0000196                                                                                                                                                                                         | act of informed consenting             | 'I hereby authorize'                  |
| ICO:0000199                                                                                                                                                                                         | permission role                        | 'hereby authorize XXX'                |
| ICO:0000244                                                                                                                                                                                         | permission directive                   | <i>entire sentence</i>                |
| ICO:0000363                                                                                                                                                                                         | temporal restriction directive         | 'during my visit'                     |
| NCBITaxon:9606                                                                                                                                                                                      | homo sapiens                           | 'I', 'my', <i>implicit</i>            |
| NCIT:C64262                                                                                                                                                                                         | biologic sample preservation procedure |                                       |
| OBI:0000066                                                                                                                                                                                         | investigation                          | 'use for scientific... purposes'      |
| OBI:0000093                                                                                                                                                                                         | patient role                           | 'I', 'my body during my visit'        |
| OBI:0000112                                                                                                                                                                                         | specimen role                          | 'sample'                              |
| OBI:0000207                                                                                                                                                                                         | health care provider role              | 'taken from my body', <i>implicit</i> |
| OBI:0000245                                                                                                                                                                                         | organization                           | 'XXX'                                 |
| OBI:0000659                                                                                                                                                                                         | specimen collection process            | 'taken from my body'                  |
| OBI:0100051                                                                                                                                                                                         | specimen                               | 'any specimen or tissues'             |
| OMRSE:00000054                                                                                                                                                                                      | hospital role                          | 'XXX'                                 |
| OMRSE:00002029                                                                                                                                                                                      | education process                      | 'use for... teaching purposes'        |
| <b>Relations</b>                                                                                                                                                                                    |                                        |                                       |
| BFO:0000051                                                                                                                                                                                         | has part                               |                                       |
| BFO:0000054                                                                                                                                                                                         | realized in                            |                                       |
| CommonCore Ontologies/prescribes                                                                                                                                                                    | prescribes                             |                                       |
| OBI:0000295                                                                                                                                                                                         | is:specified:input:of                  |                                       |
| OBI:0000299                                                                                                                                                                                         | has:specified:output                   |                                       |
| RO:0000053                                                                                                                                                                                          | bearer of                              |                                       |
| RO:0000056                                                                                                                                                                                          | participates in                        |                                       |
| RO:0002350                                                                                                                                                                                          | member of                              |                                       |
| <b>Note:</b> XXX denotes the name of a health care facility which voluntarily contributed consent form(s) for this study.                                                                           |                                        |                                       |

Table B6. Terms and Sentence References to Express the Permission-Sentence: “I am a New York state resident and I give permission for GeneDx to retain any remaining sample longer than 60 days after completion of testing and use my de-identified data for scientific and medical research purposes.”

| I am a New York state resident and I give permission for GeneDx to retain any remaining sample longer than 60 days after completion of testing and use my de-identified data for scientific and medical research purposes. |                                          |                                                       |
|----------------------------------------------------------------------------------------------------------------------------------------------------------------------------------------------------------------------------|------------------------------------------|-------------------------------------------------------|
| Ontology PURL                                                                                                                                                                                                              | Ontology Label                           | Sentence Reference                                    |
| <b>Classes</b>                                                                                                                                                                                                             |                                          |                                                       |
| ICO:0000001                                                                                                                                                                                                                | informed consent form                    | <i>Implicit</i>                                       |
| ICO:0000060                                                                                                                                                                                                                | act of storing a specimen                | 'to retain any remaining sample'                      |
| ICO:0000086                                                                                                                                                                                                                | consenter role                           | 'I give permission'                                   |
| ICO:0000113                                                                                                                                                                                                                | anonymized information content entity    | 'de-identified data'                                  |
| ICO:0000186                                                                                                                                                                                                                | permission temporal region               | 'longer than 60 days'                                 |
| ICO:0000196                                                                                                                                                                                                                | act of informed consenting               | 'I give permission'                                   |
| ICO:0000199                                                                                                                                                                                                                | permission role                          | 'I give permission to GeneDx'                         |
| ICO:0000218                                                                                                                                                                                                                | act of removing identifiable information | 'de-identified data'                                  |
| ICO:0000244                                                                                                                                                                                                                | permission directive                     | <i>Entire Sentence</i>                                |
| ICO:0000313                                                                                                                                                                                                                | excess material role                     | 'remaining sample'                                    |
| ICO:0000363                                                                                                                                                                                                                | temporal restriction directive           | 'give permission to... retain... longer than 60 days' |
| ICO:0000429                                                                                                                                                                                                                | residual clinical biospecimen            | 'remaining sample'                                    |
| LABO:0000107                                                                                                                                                                                                               | laboratory test                          | <i>Implicit</i>                                       |
| NCBITaxon:9606                                                                                                                                                                                                             | homo sapiens                             | 'I', 'my', <i>implicit</i>                            |
| NCIT:C54131                                                                                                                                                                                                                | company                                  | 'GeneDx'                                              |
| OBI:0000093                                                                                                                                                                                                                | patient role                             | 'any remaining sample', 'my deidentified data'        |
| OBI:0000112                                                                                                                                                                                                                | specimen role                            | 'sample'                                              |
| OBI:0000207                                                                                                                                                                                                                | health care provider role                | <i>Implicit</i>                                       |
| OBI:0000659                                                                                                                                                                                                                | specimen collection process              | <i>Implicit</i>                                       |
| OBI:0001769                                                                                                                                                                                                                | specimen collector role                  | <i>Implicit</i>                                       |
| OBI:0100051                                                                                                                                                                                                                | specimen                                 | 'sample'                                              |
| OGMS:0000018                                                                                                                                                                                                               | laboratory finding                       | <i>Implicit</i>                                       |
| <b>Relations</b>                                                                                                                                                                                                           |                                          |                                                       |
| BFO:0000051                                                                                                                                                                                                                | has part                                 |                                                       |
| BFO:0000054                                                                                                                                                                                                                | realized in                              |                                                       |
| CommonCore Ontologies/prescribes                                                                                                                                                                                           | prescribes                               |                                                       |
| DUO:0000010                                                                                                                                                                                                                | is restricted to                         |                                                       |
| OBI:0000293                                                                                                                                                                                                                | has:specified:input                      |                                                       |
| RO:0000053                                                                                                                                                                                                                 | bearer of                                |                                                       |
| RO:0000056                                                                                                                                                                                                                 | participates in                          |                                                       |
| RO:0002350                                                                                                                                                                                                                 | member of                                |                                                       |

Table B7. Terms and Sentence References to Express the Permission-Sentence: “I also consent to diagnostic studies, tests, anesthesia, x-ray examinations and any other treatment or courses of treatment relating to the diagnosis or procedure described herein.”

| I also consent to diagnostic studies, tests, anesthesia, x-ray examinations and any other treatment or courses of treatment relating to the diagnosis or procedure described herein. |                                  |                                                                                                                  |
|--------------------------------------------------------------------------------------------------------------------------------------------------------------------------------------|----------------------------------|------------------------------------------------------------------------------------------------------------------|
| Ontology PURL                                                                                                                                                                        | Ontology Label                   | Sentence Reference                                                                                               |
| <b>Classes</b>                                                                                                                                                                       |                                  |                                                                                                                  |
| ICO:0000001                                                                                                                                                                          | informed consent form            | <i>Implicit</i>                                                                                                  |
| ICO:0000086                                                                                                                                                                          | consenter role                   | 'I also consent to'                                                                                              |
| ICO:0000196                                                                                                                                                                          | act of informed consenting       | 'I also consent to'                                                                                              |
| ICO:0000245                                                                                                                                                                          | conditional permission directive | 'consent to... relating to the diagnosis or procedure described herein'                                          |
| NCBITaxon:9606                                                                                                                                                                       | homo sapiens                     | 'I'                                                                                                              |
| OBI:0000093                                                                                                                                                                          | patient role                     | 'I', 'diagnostic studies, tests, anesthesia, x-ray examinations and any other treatment or courses of treatment' |
| OGMS:0000096                                                                                                                                                                         | health care process              | 'diagnostic studies, tests, anesthesia, x-ray examinations and any other treatment or courses of treatment'      |
| <b>Relations</b>                                                                                                                                                                     |                                  |                                                                                                                  |
| BFO:0000051                                                                                                                                                                          | has part                         |                                                                                                                  |
| BFO:0000054                                                                                                                                                                          | realized in                      |                                                                                                                  |
| CommonCore Ontologies/prescribes                                                                                                                                                     | prescribes                       |                                                                                                                  |
| RO:0000053                                                                                                                                                                           | bearer of                        |                                                                                                                  |
| RO:0000056                                                                                                                                                                           | participates in                  |                                                                                                                  |

Table B8. Terms and Sentence References to Express the Permission-Sentence: “I DONATE and authorize XXX to own, use, retain, preserve, manipulate, analyze, or dispose of any excess tissues, specimens, or parts of organs that are removed from my body during the procedures described above and are not necessary for my diagnosis or treatment.”

| I DONATE and authorize XXX to own, use, retain, preserve, manipulate, analyze, or dispose of any excess tissues, specimens, or parts of organs that are removed from my body during the procedures described above and are not necessary for my diagnosis or treatment. |                                        |                                                                          |
|-------------------------------------------------------------------------------------------------------------------------------------------------------------------------------------------------------------------------------------------------------------------------|----------------------------------------|--------------------------------------------------------------------------|
| Ontology PURL                                                                                                                                                                                                                                                           | Ontology Label                         | Sentence Reference                                                       |
| <b>Classes</b>                                                                                                                                                                                                                                                          |                                        |                                                                          |
| CHMO:0002832                                                                                                                                                                                                                                                            | material disposal                      | 'dispose of'                                                             |
| IAO:0020027                                                                                                                                                                                                                                                             | owner role                             | 'to own'                                                                 |
| ICO:0000001                                                                                                                                                                                                                                                             | informed consent form                  | <i>Implicit</i>                                                          |
| ICO:0000060                                                                                                                                                                                                                                                             | act of storing a specimen              | 'retain'                                                                 |
| ICO:0000086                                                                                                                                                                                                                                                             | consenter role                         | 'I DONATE and authorize'                                                 |
| ICO:0000196                                                                                                                                                                                                                                                             | act of informed consenting             | 'I DONATE and authorize'                                                 |
| ICO:0000199                                                                                                                                                                                                                                                             | permission role                        | 'I... authorize XXX'                                                     |
| ICO:0000245                                                                                                                                                                                                                                                             | conditional permission directive       | 'I... authorize... and are not necessary for my diagnosis or treatment.' |
| ICO:0000313                                                                                                                                                                                                                                                             | excess material role                   | 'excess tissues, specimens, ...organs'                                   |
| ICO:0000421                                                                                                                                                                                                                                                             | act of data use                        | 'use'                                                                    |
| ICO:0000427                                                                                                                                                                                                                                                             | owner role directive                   | 'I DONATE and authorize XXX to own'                                      |
| ICO:0000428                                                                                                                                                                                                                                                             | ownership stasis                       | 'to own'                                                                 |
| ICO:0000429                                                                                                                                                                                                                                                             | residual clinical biospecimen          | 'excess tissues, specimens, ...organs'                                   |
| LABO:0000107                                                                                                                                                                                                                                                            | laboratory test                        | <i>Implicit</i>                                                          |
| NCBITaxon:9606                                                                                                                                                                                                                                                          | homo sapiens                           | 'I', 'my'                                                                |
| NCIT:C64262                                                                                                                                                                                                                                                             | biologic sample preservation procedure | 'preserve'                                                               |
| OBI:0000066                                                                                                                                                                                                                                                             | investigation                          | 'analyze'                                                                |
| OBI:0000093                                                                                                                                                                                                                                                             | patient role                           | 'I', 'my diagnosis or treatment'                                         |
| OBI:0000112                                                                                                                                                                                                                                                             | specimen role                          | 'sample'                                                                 |
| OBI:0000659                                                                                                                                                                                                                                                             | Implicit                               | 'removed from my body'                                                   |
| OBI:0100051                                                                                                                                                                                                                                                             | specimen                               | 'excess tissues, specimens, or parts of organs'                          |
| OGMS:0000018                                                                                                                                                                                                                                                            | laboratory finding                     | <i>Implicit</i>                                                          |
| OMRSE:0000056                                                                                                                                                                                                                                                           | hospital organization                  | 'XXX'                                                                    |
| XCO:0000527                                                                                                                                                                                                                                                             | genetic manipulation                   | 'manipulate'                                                             |
| <b>Relations</b>                                                                                                                                                                                                                                                        |                                        |                                                                          |
| BFO:0000051                                                                                                                                                                                                                                                             | has part                               |                                                                          |
| BFO:0000054                                                                                                                                                                                                                                                             | realized in                            |                                                                          |
| CommonCore Ontologies/prescribes                                                                                                                                                                                                                                        | prescribes                             |                                                                          |
| OBI:0000293                                                                                                                                                                                                                                                             | has:specified:input                    |                                                                          |
| OBI:0000295                                                                                                                                                                                                                                                             | is:specified:input:of                  |                                                                          |
| RO:0000053                                                                                                                                                                                                                                                              | bearer of                              |                                                                          |
| RO:0000056                                                                                                                                                                                                                                                              | participates in                        |                                                                          |
| <i>Note: XXX denotes the name of a health care facility which voluntarily contributed consent form(s) for this study.</i>                                                                                                                                               |                                        |                                                                          |

Table B9. Terms and Sentence References to Express the Permission-Sentence: “I agree that any excess tissue, fluids or specimens removed from my body during my outpatient visit or hospital stay ( my specimens ) that would otherwise be disposed of by the Hospital may be used for such educational purposes and research, including research on the genetic materials (DNA).”

| I agree that any excess tissue, fluids or specimens removed from my body during my outpatient visit or hospital stay ( my specimens ) that would otherwise be disposed of by the Hospital may be used for such educational purposes and research, including research on the genetic materials (DNA). |                               |                                                                |
|------------------------------------------------------------------------------------------------------------------------------------------------------------------------------------------------------------------------------------------------------------------------------------------------------|-------------------------------|----------------------------------------------------------------|
| Ontology PURL                                                                                                                                                                                                                                                                                        | Ontology Label                | Sentence Reference                                             |
| <b>Classes</b>                                                                                                                                                                                                                                                                                       |                               |                                                                |
| DUO:0000038                                                                                                                                                                                                                                                                                          | genetic research              | 'research, including research on the genetic materials (DNA).' |
| ICO:0000001                                                                                                                                                                                                                                                                                          | informed consent form         | <i>Implicit</i>                                                |
| ICO:0000086                                                                                                                                                                                                                                                                                          | consenter role                | 'I agree that'                                                 |
| ICO:0000196                                                                                                                                                                                                                                                                                          | act of informed consenting    | 'I agree that'                                                 |
| ICO:0000199                                                                                                                                                                                                                                                                                          | permission role               | 'I agree... by the hospital'                                   |
| ICO:0000244                                                                                                                                                                                                                                                                                          | permission directive          | <i>Entire sentence</i>                                         |
| ICO:0000313                                                                                                                                                                                                                                                                                          | excess material role          | 'excess tissue, fluids or specimens'                           |
| ICO:0000429                                                                                                                                                                                                                                                                                          | residual clinical biospecimen | 'excess tissue, fluids or specimens'                           |
| LABO:0000107                                                                                                                                                                                                                                                                                         | laboratory test               | <i>Implicit</i>                                                |
| NCBITaxon:9606                                                                                                                                                                                                                                                                                       | homo sapiens                  | 'I', 'my'                                                      |
| OBI:0000066                                                                                                                                                                                                                                                                                          | investigation                 | 'research'                                                     |
| OBI:0000093                                                                                                                                                                                                                                                                                          | patient role                  | 'during my outpatient visit or hospital stay'                  |
| OBI:0000112                                                                                                                                                                                                                                                                                          | specimen role                 | 'sample'                                                       |
| OBI:0000659                                                                                                                                                                                                                                                                                          | specimen collection process   | 'removed from my body'                                         |
| OBI:0100051                                                                                                                                                                                                                                                                                          | specimen                      | 'tissue, fluids or specimens'                                  |
| OGMS:0000018                                                                                                                                                                                                                                                                                         | laboratory finding            | <i>Implicit</i>                                                |
| OMRSE:00000056                                                                                                                                                                                                                                                                                       | hospital organization         | 'the hospital'                                                 |
| OMRSE:00002029                                                                                                                                                                                                                                                                                       | education process             | 'educational purposes'                                         |
| <b>Relations</b>                                                                                                                                                                                                                                                                                     |                               |                                                                |
| BFO:0000051                                                                                                                                                                                                                                                                                          | has part                      |                                                                |
| BFO:0000054                                                                                                                                                                                                                                                                                          | realized in                   |                                                                |
| CommonCore<br>Ontologies/prescribes                                                                                                                                                                                                                                                                  | prescribes                    |                                                                |
| OBI:0000295                                                                                                                                                                                                                                                                                          | is:specified:input:of         |                                                                |
| RO:0000053                                                                                                                                                                                                                                                                                           | bearer of                     |                                                                |
| RO:0000056                                                                                                                                                                                                                                                                                           | participates in               |                                                                |

Table B10. Terms and Sentence References to Express the Permission-Sentence: “I authorize the pathologist, at his or her discretion, to retain, preserve, use, or dispose of any tissues, organs, bones, bodily fluid or medical devices that may be removed during the operation(s) or procedure(s).”

| I authorize the pathologist, at his or her discretion, to retain, preserve, use, or dispose of any tissues, organs, bones, bodily fluid or medical devices that may be removed during the operation(s) or procedure(s). |                                        |                                                           |
|-------------------------------------------------------------------------------------------------------------------------------------------------------------------------------------------------------------------------|----------------------------------------|-----------------------------------------------------------|
| Ontology PURL                                                                                                                                                                                                           | Ontology Label                         | Sentence Reference                                        |
| <b>Classes</b>                                                                                                                                                                                                          |                                        |                                                           |
| CHMO:0002832                                                                                                                                                                                                            | material disposal                      | 'dispose'                                                 |
| ICO:0000001                                                                                                                                                                                                             | informed consent form                  | <i>Implicit</i>                                           |
| ICO:0000060                                                                                                                                                                                                             | act of storing a specimen              | 'to retain'                                               |
| ICO:0000086                                                                                                                                                                                                             | consenter role                         | 'I authorize'                                             |
| ICO:0000196                                                                                                                                                                                                             | act of informed consenting             | 'I authorize'                                             |
| ICO:0000199                                                                                                                                                                                                             | permission role                        | 'I authorize the pathologist'                             |
| ICO:0000244                                                                                                                                                                                                             | permission directive                   | <i>Entire sentence</i>                                    |
| ICO:0000313                                                                                                                                                                                                             | excess material role                   | <i>Implicit</i>                                           |
| ICO:0000421                                                                                                                                                                                                             | act of data use                        | 'use'                                                     |
| ICO:0000429                                                                                                                                                                                                             | residual clinical biospecimen          | <i>Implicit</i>                                           |
| LABO:0000107                                                                                                                                                                                                            | laboratory test                        | <i>Implicit</i>                                           |
| NCBITaxon:9606                                                                                                                                                                                                          | homo sapiens                           | 'I', 'the pathologist'                                    |
| NCIT:C64262                                                                                                                                                                                                             | biologic sample preservation procedure | 'preserve'                                                |
| OBI:0000093                                                                                                                                                                                                             | patient role                           | 'removed during the operation(s) or procedure(s)'         |
| OBI:0000112                                                                                                                                                                                                             | specimen role                          | 'sample'                                                  |
| OBI:0000145                                                                                                                                                                                                             | pathologist role                       | 'the pathologist'                                         |
| OBI:0000659                                                                                                                                                                                                             | specimen collection process            | 'removed during the operation(s) or procedure(s)'         |
| OBI:0100051                                                                                                                                                                                                             | specimen                               | 'tissues, organs, bones, bodily fluid or medical devices' |
| OGMS:0000018                                                                                                                                                                                                            | laboratory finding                     | <i>Implicit</i>                                           |
| <b>Relations</b>                                                                                                                                                                                                        |                                        |                                                           |
| BFO:0000051                                                                                                                                                                                                             | has part                               |                                                           |
| BFO:0000054                                                                                                                                                                                                             | realized in                            |                                                           |
| CommonCore Ontologies/                                                                                                                                                                                                  | prescribes                             |                                                           |
| DUO:0000010                                                                                                                                                                                                             | is restricted to                       |                                                           |
| OBI:0000293                                                                                                                                                                                                             | has:specified:input                    |                                                           |
| OBI:0000295                                                                                                                                                                                                             | is:specified:input:of                  |                                                           |
| OBI:0000299                                                                                                                                                                                                             | has:specified:output                   |                                                           |
| OBI:0000312                                                                                                                                                                                                             | is:specified:output:of                 |                                                           |
| RO:0000053                                                                                                                                                                                                              | bearer of                              |                                                           |
| RO:0000056                                                                                                                                                                                                              | participates in                        |                                                           |

Table B11. Terms and Sentence References to Express the Permission-Sentence: "I, , request and consent to the start or induction of my labor by my provider: and other assistants as may be selected by him/her."

| I, , request and consent to the start or induction of my labor by my provider: and other assistants as may be selected by him/her. |                            |                                              |
|------------------------------------------------------------------------------------------------------------------------------------|----------------------------|----------------------------------------------|
| Ontology PURL                                                                                                                      | Ontology Label             | Sentence Reference                           |
| <b>Classes</b>                                                                                                                     |                            |                                              |
| ICO:0000001                                                                                                                        | informed consent form      | <i>Implicit</i>                              |
| ICO:0000086                                                                                                                        | consenter role             | 'I, , request and consent'                   |
| ICO:0000196                                                                                                                        | act of informed consenting | 'I, , request and consent'                   |
| ICO:0000199                                                                                                                        | permission role            | 'I, , request and consent... by my provider' |
| ICO:0000244                                                                                                                        | permission directive       | <i>Entire Sentence</i>                       |
| NCBITaxon:9606                                                                                                                     | homo sapiens               | 'I, 'my provider', 'assistants'              |
| OBI:0000093                                                                                                                        | patient role               | 'I, 'induction of my labor'                  |
| OBI:0000207                                                                                                                        | health care provider role  | 'by my provider: and other assistants...'    |
| OGMS:0000096                                                                                                                       | health care process        | 'start or induction of my labor'             |
| <b>Relations</b>                                                                                                                   |                            |                                              |
| BFO:0000051                                                                                                                        | has part                   |                                              |
| BFO:0000054                                                                                                                        | realized in                |                                              |
| CommonCore<br>Ontologies/prescribes                                                                                                | prescribes                 |                                              |
| RO:0000053                                                                                                                         | bearer of                  |                                              |
| RO:0000056                                                                                                                         | participates in            |                                              |

Table B121. Terms and Sentence References to Express the Permission-Sentence: “I voluntarily consent to receive medical and health care services that may include diagnostic procedures, examination, and treatment.”

| I voluntarily consent to receive medical and health care services that may include diagnostic procedures, examination, and treatment. |                                  |                                                                                           |
|---------------------------------------------------------------------------------------------------------------------------------------|----------------------------------|-------------------------------------------------------------------------------------------|
| Ontology PURL                                                                                                                         | Ontology Label                   | Sentence Reference                                                                        |
| <b>Classes</b>                                                                                                                        |                                  |                                                                                           |
| ICO:0000001                                                                                                                           | informed consent form            | <i>Implicit</i>                                                                           |
| ICO:0000086                                                                                                                           | consenter role                   | 'consent to receive medical and health care services'                                     |
| ICO:0000196                                                                                                                           | act of informed consenting       | 'I voluntarily consent'                                                                   |
| ICO:0000244                                                                                                                           | permission directive             | <i>Entire Sentence</i>                                                                    |
| NCBITaxon:9606                                                                                                                        | homo sapiens                     | 'I', <i>implicit</i>                                                                      |
| OBI:0600003                                                                                                                           | performing a clinical assessment | 'examination'                                                                             |
| OGMS:0000090                                                                                                                          | treatment                        | 'treatment'                                                                               |
| OGMS:0000096                                                                                                                          | health care process              | 'health care services that may include diagnostic procedures, examination, and treatment' |
| OGMS:0000104                                                                                                                          | diagnostic process               | 'diagnostic procedures'                                                                   |
| <b>Relations</b>                                                                                                                      |                                  |                                                                                           |
| BFO:0000051                                                                                                                           | has part                         |                                                                                           |
| BFO:0000054                                                                                                                           | realized in                      |                                                                                           |
| CommonCore Ontologies/prescribes                                                                                                      | prescribes                       |                                                                                           |
| RO:0000053                                                                                                                            | bearer of                        |                                                                                           |
| RO:0000056                                                                                                                            | participates in                  |                                                                                           |

Table B13. Terms and Sentence References to Express the Permission-Sentence: “I consent to the use of closed-circuit television, taking of photographs (including videos), and the preparation of drawings and similar illustrative graphic material for scientific purposes providing my identity is not revealed.”

| I consent to the use of closed-circuit television, taking of photographs (including videos), and the preparation of drawings and similar illustrative graphic material for scientific purposes providing my identity is not revealed. |                                          |                                                                                                                                                         |
|---------------------------------------------------------------------------------------------------------------------------------------------------------------------------------------------------------------------------------------|------------------------------------------|---------------------------------------------------------------------------------------------------------------------------------------------------------|
| Ontology PURL                                                                                                                                                                                                                         | Ontology Label                           | Sentence Reference                                                                                                                                      |
| <b>Classes</b>                                                                                                                                                                                                                        |                                          |                                                                                                                                                         |
| BFO:0000040                                                                                                                                                                                                                           | material entity                          | 'photographs', 'videos', 'illustrative graphic material'                                                                                                |
| DUO:0000001                                                                                                                                                                                                                           | data use limitation                      | 'for scientific purposes providing my identity is not revealed'                                                                                         |
| ERO:0000333                                                                                                                                                                                                                           | video                                    | 'videos'                                                                                                                                                |
| FBbi:00000223                                                                                                                                                                                                                         | graphic illustration                     | 'illustrative graphic material'                                                                                                                         |
| IAO:0000030                                                                                                                                                                                                                           | information content entity               | 'photographs', 'videos', 'illustrative graphic material'                                                                                                |
| IAO:0000185                                                                                                                                                                                                                           | photograph                               | 'photographs'                                                                                                                                           |
| IAO:0000572                                                                                                                                                                                                                           | documenting                              | 'use of closed-circuit television, taking of photographs (including videos), and the preparation of drawings and similar illustrative graphic material' |
| ICO:0000001                                                                                                                                                                                                                           | informed consent form                    | <i>Implicit</i>                                                                                                                                         |
| ICO:0000086                                                                                                                                                                                                                           | consenter role                           | 'I consent to'                                                                                                                                          |
| ICO:0000196                                                                                                                                                                                                                           | act of informed consenting               | 'I consent to'                                                                                                                                          |
| ICO:0000199                                                                                                                                                                                                                           | permission role                          | 'consent to the use of'                                                                                                                                 |
| ICO:0000218                                                                                                                                                                                                                           | act of removing identifiable information | providing my identity is not revealed'                                                                                                                  |
| ICO:0000244                                                                                                                                                                                                                           | permission directive                     | <i>Entire Sentence</i>                                                                                                                                  |
| NCBITaxon:9606                                                                                                                                                                                                                        | homo sapiens                             | I', <i>implicit</i>                                                                                                                                     |
| OBI:0000066                                                                                                                                                                                                                           | investigation                            | 'scientific purposes'                                                                                                                                   |
| OBI:0000093                                                                                                                                                                                                                           | patient role                             | 'I', <i>implicit</i>                                                                                                                                    |
| <b>Relations</b>                                                                                                                                                                                                                      |                                          |                                                                                                                                                         |
| BFO:0000051                                                                                                                                                                                                                           | has part                                 |                                                                                                                                                         |
| BFO:0000054                                                                                                                                                                                                                           | realized in                              |                                                                                                                                                         |
| CommonCore Ontologies/                                                                                                                                                                                                                | prescribes                               |                                                                                                                                                         |
| OBI:0000295                                                                                                                                                                                                                           | is:specified:input:of                    |                                                                                                                                                         |
| OBI:0000299                                                                                                                                                                                                                           | has:specified:output                     |                                                                                                                                                         |
| RO:0000053                                                                                                                                                                                                                            | bearer of                                |                                                                                                                                                         |
| RO:0000056                                                                                                                                                                                                                            | participates in                          |                                                                                                                                                         |

Table B14. Terms and Sentence References to Express the Permission-Sentence: "I hereby consent to engaging in virtual health/telemedicine services, where available, as part of my treatment."

| I hereby consent to engaging in virtual health/telemedicine services, where available, as part of my treatment. |                            |                                                                      |
|-----------------------------------------------------------------------------------------------------------------|----------------------------|----------------------------------------------------------------------|
| Ontology PURL                                                                                                   | Ontology Label             | Sentence Reference                                                   |
| <b>Classes</b>                                                                                                  |                            |                                                                      |
| ICO:0000001                                                                                                     | informed consent form      | Implicit                                                             |
| ICO:0000086                                                                                                     | consenter role             | 'hereby consent to engaging in virtual health/telemedicine services' |
| ICO:0000196                                                                                                     | act of informed consenting | 'I hereby consent to'                                                |
| ICO:0000244                                                                                                     | permission directive       | <i>Entire Sentence</i>                                               |
| NCBITaxon:9606                                                                                                  | homo sapiens               | 'I', <i>implicit</i>                                                 |
| NCIT:C15380                                                                                                     | telemedicine               | 'virtual health/telemedicine services'                               |
| <b>Relations</b>                                                                                                |                            |                                                                      |
| BFO:0000051                                                                                                     | has part                   |                                                                      |
| BFO:0000054                                                                                                     | realized in                |                                                                      |
| CommonCore Ontologies/prescribes                                                                                | prescribes                 |                                                                      |
| RO:0000053                                                                                                      | bearer of                  |                                                                      |
| RO:0000056                                                                                                      | participates in            |                                                                      |

Table B15. Terms and Sentence References to Express the Permission-Sentence: "I request and authorize URMCLabs to perform only the above designated test(s) on the sample from me (or my child or fetus)."

| I request and authorize URMCLabs to perform only the above designated test(s) on the sample from me (or my child or fetus). |                            |                                              |
|-----------------------------------------------------------------------------------------------------------------------------|----------------------------|----------------------------------------------|
| Ontology PURL                                                                                                               | Ontology Label             | Sentence Reference                           |
| <b>Classes</b>                                                                                                              |                            |                                              |
| ICO:0000199                                                                                                                 | permission role            | 'request and authorize URMCLabs'             |
| ICO:0000086                                                                                                                 | consenter role             | 'I request and authorize'                    |
| OBI:0000245                                                                                                                 | organization               | 'URMCLabs'                                   |
| NCBITaxon:9606                                                                                                              | homo sapiens               | 'I', 'sample from me (or my child or fetus)' |
| ICO:0000244                                                                                                                 | permission directive       | <i>Entire Sentence</i>                       |
| LABO:0000107                                                                                                                | laboratory test            | 'perform only the above designated test(s)'  |
| ICO:0000196                                                                                                                 | act of informed consenting | 'I request and authorize'                    |
| ICO:0000001                                                                                                                 | informed consent form      | <i>Implicit</i>                              |
| NCIT:C16423                                                                                                                 | child                      | 'child'                                      |
| NCIT:C13235                                                                                                                 | fetus                      | 'fetus'                                      |
| <b>Relations</b>                                                                                                            |                            |                                              |
| BFO:0000051                                                                                                                 | has part                   |                                              |
| BFO:0000054                                                                                                                 | realized in                |                                              |
| CommonCore Ontologies/prescribes                                                                                            | prescribes                 |                                              |
| RO:0000053                                                                                                                  | bearer of                  |                                              |
| RO:0000056                                                                                                                  | participates in            |                                              |

## Appendix C: Citations for correspondences regarding proposed and actual changes to ICO and other OBO Foundry ontologies.

Stansbury, C. (2020, August 27). *Addition of Permissions Ontology and Umberfield Diss.*

*Updates by CooperStansbury · Pull Request #24 · ICO-ontology/ICO.* GitHub.

<https://github.com/ICO-ontology/ICO/pull/24>

Stoeckert, C. J., Buttigieg, P. L., Umberfield, E. E., Brochhausen, M., & Bost, S. (2020, April 16). *SDGIO* [Personal communication].

Umberfield, E. E. (2020a, March 26). *Obligee, Obligor, and Owner Roles - Where are they?* ·

*Issue #243 · information-artifact-ontology/IAO.* GitHub. <https://github.com/information-artifact-ontology/IAO/issues/243>

Umberfield, E. E. (2020b, April 16). *Recommended revision for “Health Care Provider Role”* ·

*Issue #1154 · obi-ontology/obi.* GitHub. <https://github.com/obi-ontology/obi/issues/1154>

Umberfield, E. E. (2020c, April 30). *Owner Role · Issue #29 · d-acts/d-acts.* GitHub.

<https://github.com/d-acts/d-acts/issues/29>

Umberfield, E. E. (2020d, October 2). *CHMO:000283—Request revision of text definition · Issue*

*#6 · rsc-ontologies/rsc-cmo.* GitHub. <https://github.com/rsc-ontologies/rsc-cmo/issues/6>

Umberfield, E. E. (2020e, October 2). *ICO Clinical Evaluation: Proposed New Terms · Issue #26*

*· ICO-ontology/ICO.* GitHub. <https://github.com/ICO-ontology/ICO/issues/26>

Umberfield, E. E. (2020f, October 2). *ICO-Clinical Evaluation: Identified gaps and import of*

*non-BFO compliant terms · Issue #25 · ICO-ontology/ICO.* GitHub.

<https://github.com/ICO-ontology/ICO/issues/25>

Umberfield, E. E. (2020g, October 2). *OGMS:0000090 and OGMS:0000096—Parent hierarchy instead of siblings?* · Issue #148 · OGMS/ogms. GitHub.

<https://github.com/OGMS/ogms/issues/148>

Umberfield, E. E. (2021a, March 25). *Import “health care provider role”* · Issue #30 · ICO-ontology/ICO. GitHub. <https://github.com/ICO-ontology/ICO/issues/30>

Umberfield, E. E. (2021b, August 11). *Modify textual definition for ‘residual clinical biospecimen’ (ICO:0000429)* · Issue #32 · ICO-ontology/ICO. GitHub.

<https://github.com/ICO-ontology/ICO/issues/32>

Umberfield, E. E., & Stansbury, C. (2020, August 27). *ICO Updates* [Personal communication].
